# Supplementary material for: An Exploratory Study of Early Immune Response Markers for Pembrolizumab in Urothelial Tract Cancer
Source: MDPI journal article supplement (doi:10.3390/uro4010001), 2024-01-12

SUPPLEMENTARY MATERIAL

| Cytokine     | POLYIC          |     |             |     | HKCA            |     |             |      | R848            |     |                |      | LPS             |     |             |      |
|--------------|-----------------|-----|-------------|-----|-----------------|-----|-------------|------|-----------------|-----|----------------|------|-----------------|-----|-------------|------|
|              | Non-progression |     | Progression |     | Non-progression |     | Progression |      | Non-progression |     | Progression    |      | Non-progression |     | Progression |      |
|              | p               | Adj | p           | Adj | p               | Adj | p           | Adj  | p               | Adj | p              | Adj  | p               | Adj | p           | Adj  |
| IFN $\alpha$ | 0.750           | 1   | 0.4180      | 1.0 | 1.00            | 1   | 0.8120      | 1.0  | 0.25            | 1   | <b>0.0156*</b> | 0.14 | 0.75            | 1   | 0.688       | 1.0  |
| IFN $\gamma$ | 0.750           | 1   | 0.8130      | 1.0 | 0.50            | 1   | 0.8120      | 1.0  | 1.00            | 1   | 0.5780         | 1.0  | 0.75            | 1   | 0.688       | 1.0  |
| IL10         | 1.000           | 1   | 0.7890      | 1.0 | 0.25            | 1   | 0.0625      | 0.56 | 1.00            | 1   | 0.4690         | 1.0  | 1.00            | 1   | 0.156       | 1.0  |
| IL12         | 1.000           | 1   | 0.5290      | 1.0 | 1.00            | 1   | 1.0000      | 1.0  | 0.75            | 1   | 0.2970         | 1.0  | 1.00            | 1   | 0.469       | 1.0  |
| IL17A        | 0.371           | 1   | 0.2970      | 1.0 | 1.00            | 1   | 0.4380      | 1.0  | 0.50            | 1   | 0.3750         | 1.0  | 0.25            | 1   | 0.578       | 1.0  |
| IL1b         | 0.500           | 1   | 0.4690      | 1.0 | 0.25            | 1   | 0.3120      | 1.0  | 0.50            | 1   | 0.5780         | 1.0  | 0.50            | 1   | 0.469       | 1.0  |
| IL6          | 0.500           | 1   | 0.5780      | 1.0 | 0.75            | 1   | 0.1250      | 1.0  | 0.50            | 1   | 0.8130         | 1.0  | 0.50            | 1   | 0.688       | 1.0  |
| IL8          | 1.000           | 1   | 0.0781      | 0.7 | 0.75            | 1   | 0.8120      | 1.0  | 1.00            | 1   | 0.5780         | 1.0  | 0.50            | 1   | 0.047       | 0.42 |
| TNF $\alpha$ | 0.500           | 1   | 0.5780      | 1.0 | 0.25            | 1   | 0.8120      | 1.0  | 0.50            | 1   | 0.4690         | 1.0  | 1.00            | 1   | 1.00        | 1.0  |

Table S1: P-values of Non-Parametric paired Wilcoxon test for the first measurement compared to the second for non-progression (0) and progression(1) groups. p=unadjusted p-value. Adj= Adjustment for family-wise error with Bonferroni-Holms method. \*: <0.05.

| P-VALUES OF DIFFERENCE(DELTA) BETWEEN PROGRESSION VS NON-PROGRESSION |                |        |                  |                 |                  |                 |         |        |
|----------------------------------------------------------------------|----------------|--------|------------------|-----------------|------------------|-----------------|---------|--------|
| Cyto<br>kine                                                         | POLYIC         |        | HKCA             |                 | R848             |                 | LPS     |        |
|                                                                      | p              | Adj    | p                | Adj             | p                | Adj             | p-value | Adj    |
| IFNa                                                                 | 0.275          | 1.0    | 0.989            | 1.0             | <b>0.00192**</b> | <b>0.01728*</b> | 0.409   | 1.0    |
| IFNg                                                                 | 0.486          | 1.0    | 0.951            | 1.0             | 0.869            | 1.0             | 0.658   | 1.0    |
| IL10                                                                 | 0.638          | 1.0    | <b>0.00343**</b> | <b>0.03087*</b> | 0.490            | 1.0             | 0.359   | 1.0    |
| IL12                                                                 | 0.563          | 1.0    | 0.926            | 1.0             | 0.471            | 1.0             | 0.814   | 1.0    |
| IL17A                                                                | 0.582          | 1.0    | 0.271            | 1.0             | 0.224            | 1.0             | 0.164   | 1.0    |
| IL1b                                                                 | 0.178          | 1.0    | 0.15             | 1.0             | 0.157            | 1.0             | 0.359   | 1.0    |
| IL6                                                                  | 0.118          | 0.9440 | 0.158            | 1.0             | 0.212            | 1.0             | 0.294   | 1.0    |
| IL8                                                                  | <b>0.0325*</b> | 0.2925 | 0.655            | 1.0             | 0.601            | 1.0             | 0.0798  | 0.7182 |
| TNFa                                                                 | 0.203          | 1.0    | 0.391            | 1.0             | 0.143            | 1.0             | 0.885   | 1.0    |

Table S2: Showing P-values (unadjusted and adjusted) for all stimuli and cytokine response, comparing the change (delta) from the first to the second measurement between progression and non-progression groups. P-values obtained by unpaired Welch T-test. Adj= adjusted for family-wise error with the Bonferroni-Holms method. \*: <0.05, \*\*: <0.01

**Figure S1.** TruCulture® principle and stimuli.

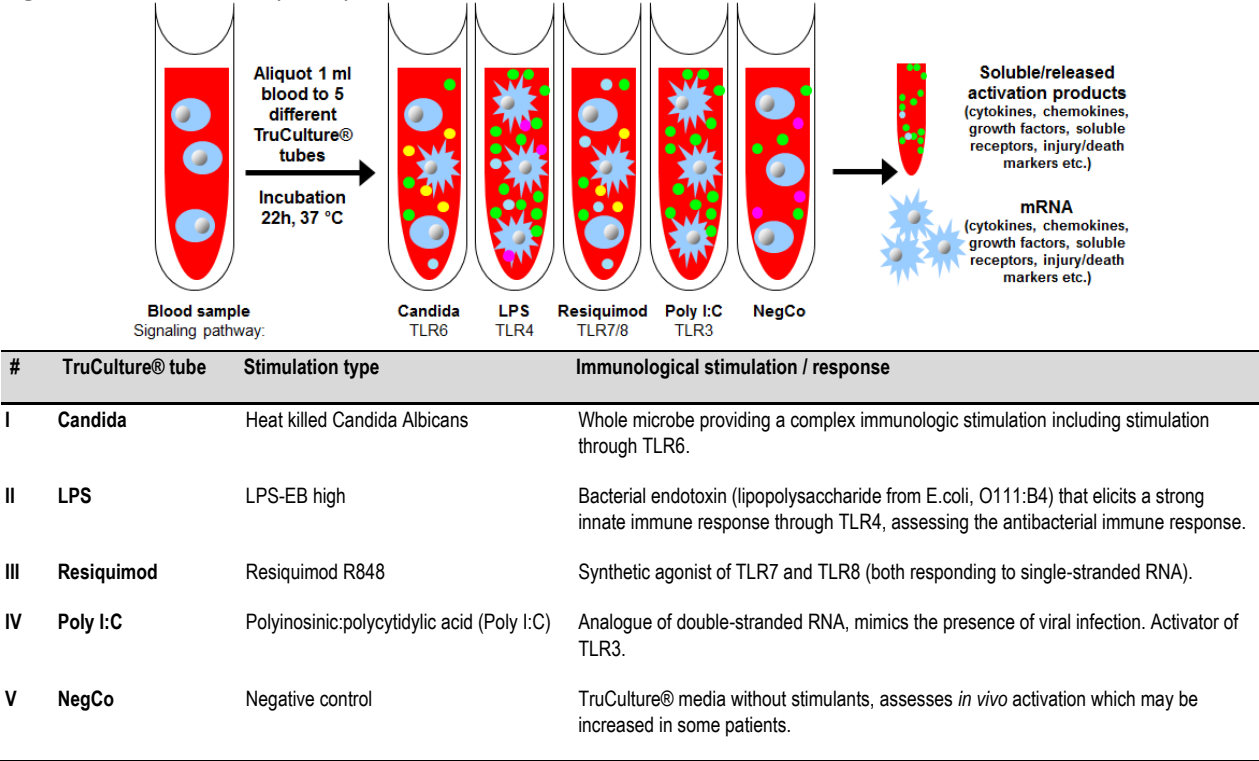

Supplement: s1 [file s1]
